# Supplementary material for: Improved Manipulator Obstacle Avoidance Path Planning Based on Potential Field Method
Source: Hindawi journal article supplement (doi:10.1155/2020/1701943), 2020-01-22
Supplement: f1 [file 1701943.f1.docx]

clear

clc

L(1)=Link([0 0 0 0 0],'modified');

L(2)=Link([0 0.14909 0 -pi/2 0],'modified');

L(3)=Link([0 0 0.4318 0 0],'modified');

L(4)=Link([0 0.43307 0.02032 -pi/2 0],'modified');

L(5)=Link([0 0 0 pi/2 0],'modified');

L(6)=Link([0 0 0 -pi/2 0],'modified');

bot=SerialLink(L,'name','my robot');%SerialLink可以把连杆联系起来形成机械臂,同时将机械臂命名为‘my robot’

mdl_planar2;%将该机器人定义在MATLAB空间，并创建名为my robot的SerialLink对象

%初始化

T0=[0 0 0 0 0 0];%初始位置

T=T0;%将初始角度赋值给T

J=27;%有27个角度组合

M=(1.8/180)*pi;%步长0+(-(2/180)*pi+2*(2/180)*pi*rand(1,1));%步长

rrR=0.1;%此为连杆的半径

k=10;%引力增益系数（k,m,Po影响目标实现）

m=1;%斥力系数

MM=150;%主循环次数

RP=0.02;%给出当前点与目标点的接近程度

X0=[0.4521 0.1491 -0.4331];%起点位置

TT=X0;

Xg0=[0.3 -0.15 0.72];%给出目标点信息

Xg=Xg0;

Xob=[0.6 0.35 -0.1;0.7 -0.4 0.3;0.5 -0.2 -0.3;1 1 0;0 0 0];%这个向量是(n)*3维，给出了障碍的位置。

rr=[0.15 0.25 0.12 0 0.2];%障碍物的半径分别为此

Xj=X0;%j=1循环初始，将起始坐标赋给Xj

ZZ1=[];%记录陷入局部极值的各个位置

sg=0;%作为调换目标点计算方法的指令，初始为0.

%****************初始化结束，开始主循环********************************

for step=1:MM

if sg==0

[goal,Xgg]=compute_goal(TT,Xg0,Xob,rr,RP);%Y是引力，斥力与x轴的角度向量,X是起点坐标。

Xg=Xgg;

else

Xg=Xggg;

sg=0;%sg=0，可释放RRT算出的目标点作用。用sg=0时，Xggg只做用一次。不用sg=0时，最后可到达Xggg附近。

end %确定了每一步的目标点

for j=1:J%遍历所有角度组合的循环

B=[T(1) T(2) T(3) 0 0 0

T(1) T(2)+M T(3) 0 0 0

T(1) T(2)-M T(3) 0 0 0

T(1) T(2) T(3)+M 0 0 0

T(1) T(2) T(3)-M 0 0 0

T(1) T(2)+M T(3)+M 0 0 0

T(1) T(2)+M T(3)-M 0 0 0

T(1) T(2)-M T(3)+M 0 0 0

T(1) T(2)-M T(3)-M 0 0 0

T(1)-M T(2) T(3) 0 0 0

T(1)-M T(2)+M T(3) 0 0 0

T(1)-M T(2)-M T(3) 0 0 0

T(1)-M T(2) T(3)+M 0 0 0

T(1)-M T(2) T(3)-M 0 0 0

T(1)-M T(2)+M T(3)+M 0 0 0

T(1)-M T(2)+M T(3)-M 0 0 0

T(1)-M T(2)-M T(3)+M 0 0 0

T(1)-M T(2)-M T(3)-M 0 0 0

T(1)+M T(2) T(3) 0 0 0

T(1)+M T(2)+M T(3) 0 0 0

T(1)+M T(2)-M T(3) 0 0 0

T(1)+M T(2) T(3)+M 0 0 0

T(1)+M T(2) T(3)-M 0 0 0

T(1)+M T(2)+M T(3)+M 0 0 0

T(1)+M T(2)+M T(3)-M 0 0 0

T(1)+M T(2)-M T(3)+M 0 0 0

T(1)+M T(2)-M T(3)-M 0 0 0];

BB=bot.fkine(B(j,:));%求一组角度的正解(末端位姿)

BBB=(BB.t)';%取末端位姿的位置坐标x y z

A10=[cos(B(j,1)) -sin(B(j,1)) 0 0;sin(B(j,1)) cos(B(j,1)) 0 0;0 0 1 0;0 0 0 1];%0 1连杆变换矩阵

A21=[cos(B(j,2)) -sin(B(j,2)) 0 0;0 0 1 0.14909;-sin(B(j,2)) -cos(B(j,2)) 0 0;0 0 0 1];%1 2连杆变换矩阵

A32=[cos(B(j,3)) -sin(B(j,3)) 0 0.4318;sin(B(j,3)) cos(B(j,3)) 0 0;0 0 1 0;0 0 0 1];%2 3连杆变换矩阵

AA1=[0 0 0];%关节角1的末端位置的x y z

A20=A10*A21;%关节2相对于基坐标的位姿

AA2=(A20(1:3,4))';%关节2相对于基坐标的位置即x y z

A30=A10*A21*A32;%关节3相对于基坐标的位姿

AA3=(A30(1:3,4))';%关节3相对于基坐标的位置即x y z

%碰撞检测开始

%开始求一元二次方程的解，根据解的个数和解的特征，判断是否碰撞。此处将连杆的半径加到障碍物的半径中，简化成球线关系，方便检测

a=AA2(1)-AA1(1);

b=AA2(2)-AA1(2);

c=AA2(3)-AA1(3);

m=AA1(1)-Xob(1,1);

n=AA1(2)-Xob(1,2);

p=AA1(3)-Xob(1,3);

bb=2*a*m+2*b*n+2*c*p;

aa=a^2+b^2+c^2;

cc=m^2+n^2+p^2-(rr(1)+rrR)^2;

delta=(bb)^2-4*(aa)*(cc);

if delta>0

f=2;

k121=real((-bb+sqrt(delta))/(2*aa));

k122=real((-bb-sqrt(delta))/(2*aa));

else if delta==0

f=1;

k12=real(-bb/(2*aa));

else

f=0;

end

end

if (f==2)&&(((0<=k121)&&(k121<=1))||((0<=k122)&&(k122<=1))||((k121<0)&&(k122>1))||((k121>1)&&(k122<0)))

break;

else

if (f==1)&&((0<=k12)&&(k121<=1))

break;

else

a=AA3(1)-AA2(1);

b=AA3(2)-AA2(2);

c=AA3(3)-AA2(3);

m=AA2(1)-Xob(1,1);

n=AA2(2)-Xob(1,2);

p=AA2(3)-Xob(1,3);

bb=2*a*m+2*b*n+2*c*p;

aa=a^2+b^2+c^2;

cc=m^2+n^2+p^2-(rr(1)+rrR)^2;

delta=(bb)^2-4*(aa)*(cc);

if delta>0

f=2;

k231=real((-bb+sqrt(delta))/(2*aa));

k232=real((-bb-sqrt(delta))/(2*aa));

else

if delta==0

f=1;

k23=real(-bb/(2*aa));

else

f=0;

end

end

if (f==2)&&(((0<=k231)&&(k231<=1))||((0<=k232)&&(k232<=1))||((k231<0)&&(k232>1))||((k231>1)&&(k232<0)))

break;

else

if (f==1)&&((0<=k23)&&(k23<=1))

break;

else

a=BBB(1)-AA3(1);

b=BBB(2)-AA3(2);

c=BBB(3)-AA3(3);

m=AA3(1)-Xob(1,1);

n=AA3(2)-Xob(1,2);

p=AA3(3)-Xob(1,3);

bb=2*a*m+2*b*n+2*c*p;

aa=a^2+b^2+c^2;

cc=m^2+n^2+p^2-(rr(1)+rrR)^2;

delta=(bb)^2-4*(aa)*(cc);

if delta>0

f=2;

k341=real((-bb+sqrt(delta))/(2*aa));

k342=real((-bb-sqrt(delta))/(2*aa));

else if delta==0

f=1;

k34=real(-bb/(2*aa));

else

f=0;

end

end

if (f==2)&&(((0<=k341)&&(k341<=1))||((0<=k342)&&(k342<=1))||((k341<0)&&(k342>1))||((k341>1)&&(k342<0)))

break;

else

if (f==1)&&((0<=k34)&&(k34<=1))

break;

else

jj=j;%输出未碰撞的j的数值

AA1;%输出此时关节角1的位置

AA2;%输出此时关节角2的位置

AA3;%输出此时关节角3的位置

BBB;%输出此时末端的位置

end

end

end

end

end

end

BBBB1(j,:)=BBB;%将遍历的所有末端位置保存在BBBB中[BBBB1]m*3

AAAA1(j,:)=AA1;%遍历的所有关节角1无碰撞的位置保存在AAAA1中[AAAA1]m*3

AAAA2(j,:)=AA2;%遍历的所有关节角2无碰撞的位置保存在AAAA2中[AAAA2]m*3

AAAA3(j,:)=AA3;%遍历的所有关节角3无碰撞的位置保存在AAAA3中[AAAA3]m*3

B61(j,:)=B(j,:);%筛选后的无碰撞关节角组合保存在B61中【B61】m*6

end%碰撞检测结束，只保存无碰撞的关节角组合于B61中

%第二波碰撞检测

for j=1:size(B61,1)

BB=bot.fkine(B61(j,:));%求一组角度的正解(末端位姿)

BBB=(BB.t)';%取末端位姿的位置坐标x y z

A10=[cos(B(j,1)) -sin(B(j,1)) 0 0;sin(B(j,1)) cos(B(j,1)) 0 0;0 0 1 0;0 0 0 1];%0 1连杆变换矩阵

A21=[cos(B(j,2)) -sin(B(j,2)) 0 0;0 0 1 0.14909;-sin(B(j,2)) -cos(B(j,2)) 0 0;0 0 0 1];%1 2连杆变换矩阵

A32=[cos(B(j,3)) -sin(B(j,3)) 0 0.4318;sin(B(j,3)) cos(B(j,3)) 0 0;0 0 1 0;0 0 0 1];%2 3连杆变换矩阵

AA1=[0 0 0];%关节角1的末端位置的x y z

A20=A10*A21;%关节2相对于基坐标的位姿

AA2=(A20(1:3,4))';%关节2相对于基坐标的位置即x y z

A30=A10*A21*A32;%关节3相对于基坐标的位姿

AA3=(A30(1:3,4))';%关节3相对于基坐标的位置即x y z

%碰撞检测开始

%开始求一元二次方程的解，根据解的个数和解的特征，判断是否碰撞。此处将连杆的半径加到障碍物的半径中，简化成球线关系，方便检测

a=AA2(1)-AA1(1);

b=AA2(2)-AA1(2);

c=AA2(3)-AA1(3);

m=AA1(1)-Xob(2,1);

n=AA1(2)-Xob(2,2);

p=AA1(3)-Xob(2,3);

bb=2*a*m+2*b*n+2*c*p;

aa=a^2+b^2+c^2;

cc=m^2+n^2+p^2-(rr(2)+rrR)^2;

delta=(bb)^2-4*(aa)*(cc);

if delta>0

f=2;

k121=real((-bb+sqrt(delta))/(2*aa));

k122=real((-bb-sqrt(delta))/(2*aa));

else if delta==0

f=1;

k12=real(-bb/(2*aa));

else

f=0;

end

end

if (f==2)&&(((0<=k121)&&(k121<=1))||((0<=k122)&&(k122<=1))||((k121<0)&&(k122>1))||((k121>1)&&(k122<0)))

break;

else

if (f==1)&&((0<=k12)&&(k121<=1))

break;

else

a=AA3(1)-AA2(1);

b=AA3(2)-AA2(2);

c=AA3(3)-AA2(3);

m=AA2(1)-Xob(2,1);

n=AA2(2)-Xob(2,2);

p=AA2(3)-Xob(2,3);

bb=2*a*m+2*b*n+2*c*p;

aa=a^2+b^2+c^2;

cc=m^2+n^2+p^2-(rr(2)+rrR)^2;

delta=(bb)^2-4*(aa)*(cc);

if delta>0

f=2;

k231=real((-bb+sqrt(delta))/(2*aa));

k232=real((-bb-sqrt(delta))/(2*aa));

else

if delta==0

f=1;

k23=real(-bb/(2*aa));

else

f=0;

end

end

if (f==2)&&(((0<=k231)&&(k231<=1))||((0<=k232)&&(k232<=1))||((k231<0)&&(k232>1))||((k231>1)&&(k232<0)))

break;

else

if (f==1)&&((0<=k23)&&(k23<=1))

break;

else

a=BBB(1)-AA3(1);

b=BBB(2)-AA3(2);

c=BBB(3)-AA3(3);

m=AA3(1)-Xob(2,1);

n=AA3(2)-Xob(2,2);

p=AA3(3)-Xob(2,3);

bb=2*a*m+2*b*n+2*c*p;

aa=a^2+b^2+c^2;

cc=m^2+n^2+p^2-(rr(2)+rrR)^2;

delta=(bb)^2-4*(aa)*(cc);

if delta>0

f=2;

k341=real((-bb+sqrt(delta))/(2*aa));

k342=real((-bb-sqrt(delta))/(2*aa));

else

if delta==0

f=1;

k34=real(-bb/(2*aa));

else

f=0;

end

end

if (f==2)&&(((0<=k341)&&(k341<=1))||((0<=k342)&&(k342<=1))||((k341<0)&&(k342>1))||((k341>1)&&(k342<0)))

break;

else

if (f==1)&&((0<=k34)&&(k34<=1))

break;

else

jj=j;%输出未碰撞的j的数值

AA1;%输出此时关节角1的位置

AA2;%输出此时关节角2的位置

AA3;%输出此时关节角3的位置

BBB;%输出此时末端的位置

end

end

end

end

end

end

BBBB2(j,:)=BBB;%将遍历的所有末端位置保存在BBBB2中[BBBB]m*3

AAAA12(j,:)=AA1;%遍历的所有关节角1无碰撞的位置保存在AAAA1中[AAAA12]m*3

AAAA22(j,:)=AA2;%遍历的所有关节角2无碰撞的位置保存在AAAA2中[AAAA22]m*3

AAAA32(j,:)=AA3;%遍历的所有关节角3无碰撞的位置保存在AAAA3中[AAAA32]m*3

B62(j,:)=B61(j,:);%筛选后的无碰撞关节角组合保存在B6中【B62】m*6

end

%第三波碰撞检测

for j=1:size(B62,1)

BB=bot.fkine(B62(j,:));%求一组角度的正解(末端位姿)

BBB=(BB.t)';%取末端位姿的位置坐标x y z

A10=[cos(B(j,1)) -sin(B(j,1)) 0 0;sin(B(j,1)) cos(B(j,1)) 0 0;0 0 1 0;0 0 0 1];%0 1连杆变换矩阵

A21=[cos(B(j,2)) -sin(B(j,2)) 0 0;0 0 1 0.14909;-sin(B(j,2)) -cos(B(j,2)) 0 0;0 0 0 1];%1 2连杆变换矩阵

A32=[cos(B(j,3)) -sin(B(j,3)) 0 0.4318;sin(B(j,3)) cos(B(j,3)) 0 0;0 0 1 0;0 0 0 1];%2 3连杆变换矩阵

AA1=[0 0 0];%关节角1的末端位置的x y z

A20=A10*A21;%关节2相对于基坐标的位姿

AA2=(A20(1:3,4))';%关节2相对于基坐标的位置即x y z

A30=A10*A21*A32;%关节3相对于基坐标的位姿

AA3=(A30(1:3,4))';%关节3相对于基坐标的位置即x y z

%碰撞检测开始

%开始求一元二次方程的解，根据解的个数和解的特征，判断是否碰撞。此处将连杆的半径加到障碍物的半径中，简化成球线关系，方便检测

a=AA2(1)-AA1(1);

b=AA2(2)-AA1(2);

c=AA2(3)-AA1(3);

m=AA1(1)-Xob(3,1);

n=AA1(2)-Xob(3,2);

p=AA1(3)-Xob(3,3);

bb=2*a*m+2*b*n+2*c*p;

aa=a^2+b^2+c^2;

cc=m^2+n^2+p^2-(rr(2)+rrR)^2;

delta=(bb)^2-4*(aa)*(cc);

if delta>0

f=2;

k121=real((-bb+sqrt(delta))/(2*aa));

k122=real((-bb-sqrt(delta))/(2*aa));

else

if delta==0

f=1;

k12=real(-bb/(2*aa));

else

f=0;

end

end

if (f==2)&&(((0<=k121)&&(k121<=1))||((0<=k122)&&(k122<=1))||((k121<0)&&(k122>1))||((k121>1)&&(k122<0)))

break;

else

if (f==1)&&((0<=k12)&&(k121<=1))

break;

else

a=AA3(1)-AA2(1);

b=AA3(2)-AA2(2);

c=AA3(3)-AA2(3);

m=AA2(1)-Xob(3,1);

n=AA2(2)-Xob(3,2);

p=AA2(3)-Xob(3,3);

bb=2*a*m+2*b*n+2*c*p;

aa=a^2+b^2+c^2;

cc=m^2+n^2+p^2-(rr(2)+rrR)^2;

delta=(bb)^2-4*(aa)*(cc);

if delta>0

f=2;

k231=real((-bb+sqrt(delta))/(2*aa));

k232=real((-bb-sqrt(delta))/(2*aa));

else

if delta==0

f=1;

k23=real(-bb/(2*aa));

else

f=0;

end

end

if (f==2)&&(((0<=k231)&&(k231<=1))||((0<=k232)&&(k232<=1))||((k231<0)&&(k232>1))||((k231>1)&&(k232<0)))

break;

else

if (f==1)&&((0<=k23)&&(k23<=1))

break;

else

a=BBB(1)-AA3(1);

b=BBB(2)-AA3(2);

c=BBB(3)-AA3(3);

m=AA3(1)-Xob(3,1);

n=AA3(2)-Xob(3,2);

p=AA3(3)-Xob(3,3);

bb=2*a*m+2*b*n+2*c*p;

aa=a^2+b^2+c^2;

cc=m^2+n^2+p^2-(rr(2)+rrR)^2;

delta=(bb)^2-4*(aa)*(cc);

if delta>0

f=2;

k341=real((-bb+sqrt(delta))/(2*aa));

k342=real((-bb-sqrt(delta))/(2*aa));

else if delta==0

f=1;

k34=real(-bb/(2*aa));

else

f=0;

end

end

if (f==2)&&(((0<=k341)&&(k341<=1))||((0<=k342)&&(k342<=1))||((k341<0)&&(k342>1))||((k341>1)&&(k342<0)))

break;

else

if (f==1)&&((0<=k34)&&(k34<=1))

break;

else

jj=j;%输出未碰撞的j的数值

AA1;%输出此时关节角1的位置

AA2;%输出此时关节角2的位置

AA3;%输出此时关节角3的位置

BBB;%输出此时末端的位置

end

end

end

end

end

end

BBBB3(j,:)=BBB;%将遍历的所有末端位置保存在BBBB中[BBBB3]m*3

AAAA13(j,:)=AA1;%遍历的所有关节角1无碰撞的位置保存在AAAA1中[AAAA13]m*3

AAAA23(j,:)=AA2;%遍历的所有关节角2无碰撞的位置保存在AAAA2中[AAAA23]m*3

AAAA33(j,:)=AA3;%遍历的所有关节角3无碰撞的位置保存在AAAA3中[AAAA33]m*3

B63(j,:)=B62(j,:);%筛选后的无碰撞关节角组合保存在B6中【B63】m*6

end

%第四波碰撞检测

for j=1:size(B63,1)

BB=bot.fkine(B63(j,:));%求一组角度的正解(末端位姿)

BBB=(BB.t)';%取末端位姿的位置坐标x y z

A10=[cos(B(j,1)) -sin(B(j,1)) 0 0;sin(B(j,1)) cos(B(j,1)) 0 0;0 0 1 0;0 0 0 1];%0 1连杆变换矩阵

A21=[cos(B(j,2)) -sin(B(j,2)) 0 0;0 0 1 0.14909;-sin(B(j,2)) -cos(B(j,2)) 0 0;0 0 0 1];%1 2连杆变换矩阵

A32=[cos(B(j,3)) -sin(B(j,3)) 0 0.4318;sin(B(j,3)) cos(B(j,3)) 0 0;0 0 1 0;0 0 0 1];%2 3连杆变换矩阵

AA1=[0 0 0];%关节角1的末端位置的x y z

A20=A10*A21;%关节2相对于基坐标的位姿

AA2=(A20(1:3,4))';%关节2相对于基坐标的位置即x y z

A30=A10*A21*A32;%关节3相对于基坐标的位姿

AA3=(A30(1:3,4))';%关节3相对于基坐标的位置即x y z

%碰撞检测开始

%开始求一元二次方程的解，根据解的个数和解的特征，判断是否碰撞。此处将连杆的半径加到障碍物的半径中，简化成球线关系，方便检测

a=AA2(1)-AA1(1);

b=AA2(2)-AA1(2);

c=AA2(3)-AA1(3);

m=AA1(1)-Xob(4,1);

n=AA1(2)-Xob(4,2);

p=AA1(3)-Xob(4,3);

bb=2*a*m+2*b*n+2*c*p;

aa=a^2+b^2+c^2;

cc=m^2+n^2+p^2-(rr(2)+rrR)^2;

delta=(bb)^2-4*(aa)*(cc);

if delta>0

f=2;

k121=real((-bb+sqrt(delta))/(2*aa));

k122=real((-bb-sqrt(delta))/(2*aa));

else

if delta==0

f=1;

k12=real(-bb/(2*aa));

else

f=0;

end

end

if (f==2)&&(((0<=k121)&&(k121<=1))||((0<=k122)&&(k122<=1))||((k121<0)&&(k122>1))||((k121>1)&&(k122<0)))

break;

else

if (f==1)&&((0<=k12)&&(k121<=1))

break;

else

a=AA3(1)-AA2(1);

b=AA3(2)-AA2(2);

c=AA3(3)-AA2(3);

m=AA2(1)-Xob(4,1);

n=AA2(2)-Xob(4,2);

p=AA2(3)-Xob(4,3);

bb=2*a*m+2*b*n+2*c*p;

aa=a^2+b^2+c^2;

cc=m^2+n^2+p^2-(rr(2)+rrR)^2;

delta=(bb)^2-4*(aa)*(cc);

if delta>0

f=2;

k231=real((-bb+sqrt(delta))/(2*aa));

k232=real((-bb-sqrt(delta))/(2*aa));

else

if delta==0

f=1;

k23=real(-bb/(2*aa));

else

f=0;

end

end

if (f==2)&&(((0<=k231)&&(k231<=1))||((0<=k232)&&(k232<=1))||((k231<0)&&(k232>1))||((k231>1)&&(k232<0)))

break;

else

if (f==1)&&((0<=k23)&&(k23<=1))

break;

else

a=BBB(1)-AA3(1);

b=BBB(2)-AA3(2);

c=BBB(3)-AA3(3);

m=AA3(1)-Xob(4,1);

n=AA3(2)-Xob(4,2);

p=AA3(3)-Xob(4,3);

bb=2*a*m+2*b*n+2*c*p;

aa=a^2+b^2+c^2;

cc=m^2+n^2+p^2-(rr(2)+rrR)^2;

delta=(bb)^2-4*(aa)*(cc);

if delta>0

f=2;

k341=real((-bb+sqrt(delta))/(2*aa));

k342=real((-bb-sqrt(delta))/(2*aa));

else

if delta==0

f=1;

k34=real(-bb/(2*aa));

else

f=0;

end

end

if (f==2)&&(((0<=k341)&&(k341<=1))||((0<=k342)&&(k342<=1))||((k341<0)&&(k342>1))||((k341>1)&&(k342<0)))

break;

else

if (f==1)&&((0<=k34)&&(k34<=1))

break;

else

jj=j;%输出未碰撞的j的数值

AA1;%输出此时关节角1的位置

AA2;%输出此时关节角2的位置

AA3;%输出此时关节角3的位置

BBB;%输出此时末端的位置

end

end

end

end

end

end

BBBB4(j,:)=BBB;%将遍历的所有末端位置保存在BBBB中[BBBB3]m*3

AAAA14(j,:)=AA1;%遍历的所有关节角1无碰撞的位置保存在AAAA1中[AAAA13]m*3

AAAA24(j,:)=AA2;%遍历的所有关节角2无碰撞的位置保存在AAAA2中[AAAA23]m*3

AAAA34(j,:)=AA3;%遍历的所有关节角3无碰撞的位置保存在AAAA3中[AAAA33]m*3

B64(j,:)=B63(j,:);%筛选后的无碰撞关节角组合保存在B6中【B63】m*6

end

%下面是关于计算最小和势能的for循环

for JJ=1:1:size(B64,1)%size(B64,1)表示获取矩阵B63的行数，size(B64,2)表示获取矩阵B64的列数

Xj=BBBB4(JJ,:);%当前末端位置放在Xj中。

%调用计算角度的模块，将与目标的角度和与障碍物的角度Xg,Xob合成Xsum

Xsum=[Xg;Xob];

Theta=compute_ANGLE11(Xj,Xsum);

Angle=Theta(1,:);%用Angle表示当前位置和目标之间的角度，目标对当前点是引力。【Angle】为1x3矩阵

%调用计算引力模块

[Fatx,Faty,Fatz]=compute_ATTRACT11(Xj,Xg,k,Angle); %计算出目标点在x,y,z方向对机器人的引力

%调用计算斥力模块

for i=1:size(Xob,1)%size(Xob,1)可表示障碍物的数量

angle_re(i,:)=Theta(i+1,:);%计算斥力用的角度，是个向量，因为有n个障碍,又分X Y Z轴三个方向的夹角。[angle_re(i,:)] 为nx3矩阵

%算出当前点与每个障碍物的最近的切点坐标【Xobbb】为nx3矩阵

a=(Xj(1)-Xob(i,1))/sqrt((Xj(1)-Xob(i,1))^2+(Xj(2)-Xob(i,2))^2+(Xj(3)-Xob(i,3))^2);

b=(Xj(2)-Xob(i,2))/sqrt((Xj(1)-Xob(i,1))^2+(Xj(2)-Xob(i,2))^2+(Xj(3)-Xob(i,3))^2);

c=(Xj(3)-Xob(i,3))/sqrt((Xj(1)-Xob(i,1))^2+(Xj(2)-Xob(i,2))^2+(Xj(3)-Xob(i,3))^2);

Xobbb(i,:)=[Xob(i,1)+rr(i)*a Xob(i,2)+rr(i)*b Xob(i,3)+rr(i)*c];%记录各最近切点的位置。

end

[Frerxx,Freryy,Frerzz]=compute_REPULSION11(Xj,Xg,Xobbb,m,angle_re,rr);%计算出斥力在x,y,z方向的分量数组。

%计算出合力

Fsumxj=Fatx+Frerxx;%x方向的引力和斥力的合力

Fsumyj=Faty+Freryy;%y方向的引力和斥力的合力

Fsumzj=Fatz+Frerzz;%z方向的引力和斥力的合力.

Ft=sqrt((Fsumxj)^2+(Fsumyj)^2+(Fsumzj)^2);%总合力大小

Ftt1(JJ)=Ft;%记录所有的角度组合的合力到Ft中。

Ftt=Ftt1.';%Ftt为转置成的列矩阵。

[Bestf,Indexf]=sort(Ftt,1);%对Ftt的列元素进行升序排列，Bestf表示排序后的各元素，Indexf记录排序后各元素的原有行

gBestfi=Bestf(1);%取升序排列后的第一个元素，即合力最小的值

gBestp=Indexf(1);%取最小值所在的行号

Tnext=B63(gBestp,:);%对应的合力最小的关节角组合【Tnext】1*6。

TTnext=BBBB3(gBestp,:);%得出此时的末端位置

end

%判断是否到达目标点附近。

if sqrt(((TTnext(1)-Xg0(1))^2)+((TTnext(2)-Xg0(2))^2)+((TTnext(3)-Xg0(3))^2))<RP %判断是否到达最终目标点附近

ZZZZ=step;%记录到达目标点附近时的步数

break; %此时已到达最终目标点附近，跳出大循环

end

Tmin(step,:)=Tnext;%记录每一步最合适的角度组合【Tmin】step*6

TTmin(step,:)=TTnext;%记录每一步最合适的末端位置【TTmin】step*3

ll=size(TTmin,1);%读出TTmin的行数。

ff=TTmin(ll,:);%取TTmin的最后一行。

Ff1=TTmin(1:(ll-1),:);%取TTmin的除去最后1行的矩阵。

[Lia1,Locb1]=ismember(ff,Ff1,'rows');%Lia表示ff是否为Ff的行，是返回1，不是返回0 Locb表示ff是Ff的第几行。

if (Lia1==1)%判断是否出现两行值相同的情况。若是此处需要处理陷入局部极值的情况。

ZZ1=[ZZ1;step];%记录所有陷入局部极值的位置

[gBestx]=compute_gBestx(T,Xg,Xob,rr,k,m,rrR);

Tnext=[T(1)+gBestx(1) T(2)+gBestx(2) T(3)+gBestx(3) 0 0 0];

TTnext=(bot.fkine(Tnext).t)';%取末端位姿的位置坐标x y z

[Xggg,vertices,path]=compute_XggRRT(Xob,rr,rrR,Xg0,TTnext);%采用RRT算法设置虚拟目标点

sg=1;%此为切换计算目标点方法的指令

end

CHA=sqrt((TTnext(1)-TT(1))^2+(TTnext(2)-TT(2))^2+(TTnext(3)-TT(3))^2);

CCHA(step)=CHA;

ZCHA=sum(CCHA);%记录末端走过的总距离

JDCHA=abs([Tnext(1)-T(1),Tnext(2)-T(2),Tnext(3)-T(3)]);%abs函数是求绝对值。

JDCHAH=JDCHA(1)+JDCHA(2)+JDCHA(3);

JJDCHA(step)=JDCHAH;

ZJDCHA=sum(JJDCHA);%记录整个机械臂的角度变化总和

T=Tnext;%更新下一步的角度信息

TT=TTnext;%更新下一步的位置信息

Tmin(step,:)=Tnext;%记录每一步最合适的角度组合【Tmin】step*6

TTmin(step,:)=TTnext;%记录每一步最合适的末端位置【TTmin】step*3

Goal(step,1)=TT(1); %Goal是保存末端走过的每个点的坐标。刚开始先将起点分别放进该向量x、y、z

Goal(step,2)=TT(2);

Goal(step,3)=TT(3);

end%主循环结束。

K=step;

Goal(K,1)=Xg(1);%把路径向量的最后一个点赋值为目标

Goal(K,2)=Xg(2);

Goal(K,3)=Xg(3);

X=Goal(:,1);%路径向量Goal是三维数组,X,Y,Z分别是数组的x,y,z元素的集合，是三个一维数组。

Y=Goal(:,2);

Z=Goal(:,3);

%画图1展示机械臂的运动全过程

figure(1);

[x,y,z]=sphere(20);%表示画一个立体球，20代表沿着经度、纬度方向被分成的面片数。

x=Xob(1,1)+rr(1)*x;

y=Xob(1,2)+rr(1)*y;

z=Xob(1,3)+rr(1)*z;

surf(x,y,z);%球心为（Xob(1,1)，Xob(1,2)，Xob(1,3)）半径为rr(1)

xlabel('x');%横轴（x轴）方向上显示一个“标签”此为“x”

ylabel('y');%纵轴（y轴）方向上显示一个“标签”此为“y”

zlabel('z');%竖轴（z轴）方向上显示一个“标签”此为“z”

%完成障碍物1的绘制

hold on;

[x,y,z]=sphere(20);

x=Xob(2,1)+rr(2)*x;

y=Xob(2,2)+rr(2)*y;

z=Xob(2,3)+rr(2)*z;

surf(x,y,z);

xlabel('x');

ylabel('y');

zlabel('z');

hold off;

%完成障碍物2的绘制

hold on;

[x,y,z]=sphere(20);

x=Xob(3,1)+rr(3)*x;

y=Xob(3,2)+rr(3)*y;

z=Xob(3,3)+rr(3)*z;

surf(x,y,z);

xlabel('x');%横轴（x轴）方向上显示一个“标签”此为“x”

ylabel('y');

zlabel('z');

hold off;

%完成障碍物3的绘制

hold on;

[x,y,z]=sphere(20);

x=Xob(4,1)+rr(4)*x;

y=Xob(4,2)+rr(4)*y;

z=Xob(4,3)+rr(4)*z;

surf(x,y,z);

xlabel('x');%横轴（x轴）方向上显示一个“标签”此为“x”

ylabel('y');

zlabel('z');

hold off;

%完成障碍物4的绘制

bot.plot(Tmin,'floorlevel',0);%显示出机械臂的变化过程，Tmin为具体的角度变化情况

hold on;

plot3(Xg(1),Xg(2),Xg(3),'v',X0(1),X0(2),X0(3),'ms',real(X),real(Y),real(Z),'-r','linewidth',3);%real(XX0),real(YY0),real(ZZ0),'-b',

hold off;

grid on;%表示在画图时添加网格

title('机械臂路径规划');

%画图2展示机械臂的个角度的变化情况

figure(2);

x1=1:1:K-1;

y1=Tmin(x1,1);

y2=Tmin(x1,2);

y3=Tmin(x1,3);

plot(x1,y1,'-b',x1,y2,'-r',x1,y3,'-m');

xlabel('步数');

ylabel('角度/rad');

title('各角度变化情况');

legend('关节角1','关节角2','关节角3');

function [goal,Xgg]=compute_goal(TT,Xg0,Xob,rr,RP)

l=0.03;%步长

J=200;%最大循环迭代次数

k=10;%引力增益系数（k,m,Po影响目标实现）

m=1;%斥力系数

Xsum=[Xg0;Xob];%将目标点和障碍物的坐标信息放在一起 【A;B】可完成A和B矩阵的上下合并

Xj=TT;%将起始坐标赋给Xj

Xg=Xg0;%将目标点坐标赋给Xg

%***************初始化结束，开始主体循环******************

for j=1:1:J %循环开始

goal(j,1)=Xj(1); %goal是保存走过的每个点的坐标。刚开始先将起点分别放进该向量x、y、z

goal(j,2)=Xj(2);

goal(j,3)=Xj(3);

%调用计算角度的模块。

Theta=compute_angle(Xj,Xsum);

Angle=Theta(1,:);%计算引力的角度

%调用计算引力模块

[Yatx,Yaty,Yatz]=compute_Attract(Xj,Xg,k,Angle); %计算出目标点在x,y,z方向对当前末端位置的引力

%调用计算斥力模块

%先用一个for循环得出当前点与各障碍物的角度和距离各障碍物最近的切点坐标

for i1=1:size(Xob,1)

angle_re(i1,:)=Theta(i1+1,:);%计算斥力用的角度

a1=(Xj(1)-Xob(i1,1))/sqrt((Xj(1)-Xob(i1,1))^2+(Xj(2)-Xob(i1,2))^2+(Xj(3)-Xob(i1,3))^2);

b1=(Xj(2)-Xob(i1,2))/sqrt((Xj(1)-Xob(i1,1))^2+(Xj(2)-Xob(i1,2))^2+(Xj(3)-Xob(i1,3))^2);

c1=(Xj(3)-Xob(i1,3))/sqrt((Xj(1)-Xob(i1,1))^2+(Xj(2)-Xob(i1,2))^2+(Xj(3)-Xob(i1,3))^2);

Xobbb(i1,:)=[Xob(i1,1)+rr(i1)*a1 Xob(i1,2)+rr(i1)*b1 Xob(i1,3)+rr(i1)*c1];%记录各最近切点的位置。

end

[Yrerxx,Yreryy,Yrerzz]=compute_repulsion(Xj,Xg,Xobbb,m,angle_re,rr);

%计算出合力

Fsumxj=Yatx+Yrerxx;%x方向的引力和斥力的合力

Fsumyj=Yaty+Yreryy;%y方向的引力和斥力的合力

Fsumzj=Yatz+Yrerzz;%z方向的引力和斥力的合力.

Ft=sqrt((Fsumxj)^2+(Fsumyj)^2+(Fsumzj)^2);%总合力大小

%计算下一步位置

Xnext(1)=Xj(1)+l*(Fsumxj/Ft);

Xnext(2)=Xj(2)+l*(Fsumyj/Ft);

Xnext(3)=Xj(3)+l*(Fsumzj/Ft);

%保存机械臂末端的每一个位置在向量中

XX(j)=Fsumxj;%记录x方向合力的每一步的值

YY(j)=Fsumyj;%记录y方向合力的每一步的值

ZZ(j)=Fsumzj;%记录z方向合力的每一步的值

FF(j)=Ft;%记录每一步总合力的值

CHA=sqrt((Xnext(1)-Xj(1))^2+(Xnext(1)-Xj(1))^2+(Xnext(1)-Xj(1))^2);

CCHA(j)=CHA;

ZCHAA=sum(CCHA);

Xj=Xnext;%更新位置信息

if sqrt(((Xj(1)-Xg(1))^2)+((Xj(2)-Xg(2))^2)+((Xj(3)-Xg(3))^2))<RP %判断是否到达目标点附近，若是，当前点与目标点的距离小于RP

break;%此时已到达目标点附近

end%如果不符合if的条件，重新返回循环，继续执行。

end%大循环结束

K=j;

goal(K,1)=Xg(1);%把路径向量的最后一个点赋值为目标

goal(K,2)=Xg(2);

goal(K,3)=Xg(3);

if ZCHAA<=0.1

Xgg=Xg0;

else

P=size(goal,1);

%a=1/3;

a=1/3+(1/3)*rand;

Xgg=goal(ceil(a*P),:);

end

%**************************画出障碍，起点，目标，路径*************************

function Theta=compute_angle(Xj,Xsum)%Xsum是目标和障碍的坐标向量,是(n+2)*2矩阵

for i=1:size(Xsum,1)%n是原有障碍物的个数

deltaXi=Xsum(i,1)-Xj(1);

deltaYi=Xsum(i,2)-Xj(2);

deltaZi=Xsum(i,3)-Xj(3);

ri=sqrt(deltaXi^2+deltaYi^2+deltaZi^2);%向量的模的计算

%开始计算各角度

if deltaXi>0

thetaX=acos(deltaXi/ri);%此处计算出的值是弧度，变成角度制*180/pi。此时为锐角的情况

else

thetaX=pi-acos(-deltaXi/ri);%钝角

end

if deltaYi>0

thetaY=acos(deltaYi/ri);

else

thetaY=pi-acos(-deltaYi/ri);

end

if deltaZi>0

thetaZ=acos(deltaZi/ri);

else

thetaZ=pi-acos(-deltaZi/ri);

end

if i==1%表示是目标点

angle=[thetaX thetaY thetaZ];%表示从当前位置点指向目标点的向量与x,y,z的夹角，引力

else

angle=[pi+thetaX pi+thetaY pi+thetaZ];%加pi改箭头方向，表示从当前位置点指向障碍物向量的反向与x,y,z的夹角，斥力

end

Theta(i,:)=angle;%保存每个角度在Theta向量里面，第一个元素是与目标的角度，后面都是与障碍的角度

end%结束for循环

end%结束function

function [Yatx,Yaty,Yatz]=compute_Attract(Xj,Xg,k,Angle)

R=(Xj(1)-Xg(1))^2+(Xj(2)-Xg(2))^2+(Xj(3)-Xg(3))^2;

r=sqrt(R);%当前末端位置和目标点位置的距离

Yatx=k*r*cos(Angle(1));%x轴方向的引力

Yaty=k*r*cos(Angle(2));%y轴方向的引力

Yatz=k*r*cos(Angle(3));%z轴方向的引力

end

function [Yrerxx,Yreryy,Yrerzz]=compute_repulsion(Xj,Xg,Xobbb,m,angle_re,rr)

for i=1:size(Xobbb,1)

Rre(i)=(Xobbb(i,1)-Xj(1))^2+(Xobbb(i,2)-Xj(2))^2+(Xobbb(i,3)-Xj(3))^2;

rre(i)=sqrt(Rre(i));%当前末端位置和障碍物最近切点的距离保存在数组rre中

B=(Xj(1)-Xg(1))^2+(Xj(2)-Xg(2))^2+(Xj(3)-Xg(3))^2;

b=sqrt(B);%当前末端位置和目标点位置的距离

Po=(2/3)*rr(i);%障碍物的影响距离，有各自的半径大小决定

if rre(i)>Po%如果每个障碍和当前末端位置的距离大于Po，斥力令为0

Yrerx(i)=0;

Yrery(i)=0;

Yrerz(i)=0;

else

Yrer=m*(1/(rre(i))-1/Po)*(1/((rre(i))^2));

Yrerx(i)=Yrer*cos(angle_re(i,1));%斥力在x轴方向的分力

Yrery(i)=Yrer*cos(angle_re(i,2));%斥力在y轴方向的分力

Yrerz(i)=Yrer*cos(angle_re(i,3));%斥力在z轴方向的分力

end

end%结束for循环

Yrerxx=sum(Yrerx(:));%叠加斥力的分量，x方向的

Yreryy=sum(Yrery(:));%y方向的

Yrerzz=sum(Yrerz(:));%z方向的

end%结束function

end

function Theta=compute_ANGLE11(Xj,Xsum)

for i=1:size(Xsum,1)

deltaXi=Xsum(i,1)-Xj(1);

deltaYi=Xsum(i,2)-Xj(2);

deltaZi=Xsum(i,3)-Xj(3);

ri=sqrt(deltaXi^2+deltaYi^2+deltaZi^2);

%开始计算各角度

if deltaXi>0

thetaX=acos(deltaXi/ri);%此处计算出的值是弧度，变成角度制*180/pi。此时为锐角的情况

else

thetaX=pi-acos(-deltaXi/ri);%钝角

end

if deltaYi>0

thetaY=acos(deltaYi/ri);

else

thetaY=pi-acos(-deltaYi/ri);

end

if deltaZi>0

thetaZ=acos(deltaZi/ri);

else

thetaZ=pi-acos(-deltaZi/ri);

end

if i==1%表示是目标

angle=[thetaX thetaY thetaZ];%表示从当前位置点指向目标点的向量与x,y,z的夹角，引力

else

angle=[pi+thetaX pi+thetaY pi+thetaZ];%加pi改箭头方向，表示从当前位置点指向障碍物向量的反向与x,y,z的夹角，斥力

end

Theta(i,:)=angle;%保存每个角度在Theta向量里面，第一个元素是与目标的角度，后面都是与障碍的角度

end%结束for循环

end%结束function

function [Fatx,Faty,Fatz]=compute_ATTRACT11(Xj,Xg,k,Angle)

R=(Xj(1)-Xg(1))^2+(Xj(2)-Xg(2))^2+(Xj(3)-Xg(3))^2;

r=sqrt(R);%%当前末端位置和目标点位置的距离

Fatx=k*r*cos(Angle(1));%x轴方向的引力

Faty=k*r*cos(Angle(2));%y轴方向的引力

Fatz=k*r*cos(Angle(3));%z轴方向的引力

end

function [Frerxx,Freryy,Frerzz]=compute_REPULSION11(Xj,Xg,Xobbb,m,angle_re,rr)

for i=1:size(Xobbb,1) %size(Xobbb,1)可表示障碍物的数量

Rre(i)=(Xobbb(i,1)-Xj(1))^2+(Xobbb(i,2)-Xj(2))^2+(Xobbb(i,3)-Xj(3))^2;

rre(i)=sqrt(Rre(i));%当前末端位置和障碍物最近切点的距离保存在数组rre中

B=(Xj(1)-Xg(1))^2+(Xj(2)-Xg(2))^2+(Xj(3)-Xg(3))^2;

b=sqrt(B);%当前末端位置和目标点位置的距离

Po=(2/3)*rr(i);%障碍物的影响距离，有各自的半径大小决定

if rre(i)>Po%如果每个障碍和当前末端位置的距离大于Po，斥力令为0

Yrerx(i)=0;

Yrery(i)=0;

Yrerz(i)=0;

else

Yrer=m*(1/(rre(i))-1/Po)*(1/((rre(i))^2));

Yrerx(i)=Yrer*cos(angle_re(i,1));%斥力在x轴方向的分力

Yrery(i)=Yrer*cos(angle_re(i,2));%斥力在y轴方向的分力

Yrerz(i)=Yrer*cos(angle_re(i,3));%斥力在z轴方向的分力

end

end%结束for循环

Frerxx=sum(Yrerx(:));%叠加斥力的分量，x方向的

Freryy=sum(Yrery(:));%y方向的

Frerzz=sum(Yrerz(:));%z方向的

end%结束function

function gBestx=compute_gBestx(T,Xg,Xob,rr,k,m,rrR)

Size=5;

CodeL=3;

MinX(1)=(-3/180)*pi;

MaxX(1)=(3/180)*pi;

MinX(2)=(-3/180)*pi;

MaxX(2)=(3/180)*pi;

MinX(3)=(-3/180)*pi;

MaxX(3)=(3/180)*pi;

%初始化开始

fai(:,1)=2*pi*rand(Size,1);

sita(:,1)=pi*rand(Size,1);

fai(:,2)=2*pi*rand(Size,1);

sita(:,2)=pi*rand(Size,1);

fai(:,3)=2*pi*rand(Size,1);

sita(:,3)=pi*rand(Size,1);

p(:,1,1)=cos(fai(:,1)).*sin(sita(:,1));

p(:,1,2)=sin(fai(:,1)).*sin(sita(:,1));

p(:,1,3)=cos(sita(:,1));

p(:,2,1)=cos(fai(:,2)).*sin(sita(:,2));

p(:,2,2)=sin(fai(:,2)).*sin(sita(:,2));

p(:,2,3)=cos(sita(:,2));

p(:,3,1)=cos(fai(:,3)).*sin(sita(:,3));

p(:,3,2)=sin(fai(:,3)).*sin(sita(:,3));

p(:,3,3)=cos(sita(:,3));

pm0=0.1;%设置变异概率初始值 pm放在主循环中了，随迭代次数变化 Pm=ones(1,Size)*pm0*(G-kg)/G;

G=10;%设置代数

%BsJ=0;%设置评价值。

%解空间开始变换

x(:,1,:)=0.5*(MaxX(1)*(1+p(:,1,:))+MinX(1)*(1-p(:,1,:)));

x(:,2,:)=0.5*(MaxX(2)*(1+p(:,2,:))+MinX(2)*(1-p(:,2,:)));

x(:,3,:)=0.5*(MaxX(3)*(1+p(:,3,:))+MinX(3)*(1-p(:,3,:)));

%计算函数值开始

for i=1:1:Size

x11=x(i,1,1);x12=x(i,2,1);x13=x(i,3,1);

x21=x(i,1,2);x22=x(i,2,2);x23=x(i,3,2);

x31=x(i,1,3);x32=x(i,2,3);x33=x(i,3,3);

B=[T(1)+x11 T(2)+x12 T(3)+x13 0 0 0];

Ft=compute_Ftt(B,Xob,Xg,rrR,rr,k);

F(i,1)=Ft;

B=[T(1)+x21 T(2)+x22 T(3)+x23 0 0 0];

Ft=compute_Ftt(B,Xob,Xg,rrR,rr,k);

F(i,2)=Ft;

B=[T(1)+x31 T(2)+x32 T(3)+x33 0 0 0];

Ft=compute_Ftt(B,Xob,Xg,rrR,rr,k);

F(i,3)=Ft;

end

%开始获得最小值及相应自变量

[Bestf,Indexf]=sort(F,2);

[BestF,IndexF]=sort(Bestf,1);

gBestfi=BestF(1,1);%最小函数值

gBestp=IndexF(1,1);%最好染色体号

gBests=Indexf(gBestp,1);%最好基因链号

gBestx=x(gBestp,:,gBests);%最优解

gBestC=p(gBestp,:,:);%最优染色体

%主循环开始

for kg=1:1:G

time(kg)=kg;

%开始更新量子位

for i=1:1:Size

for j=1:1:CodeL

if p(i,j,1)*gBestC(1,j,2)>gBestC(1,j,1)*p(i,j,2)

fai(i,j)=fai(i,j)+0.05*pi;

end

if p(i,j,1)*gBestC(1,j,2)<gBestC(1,j,1)*p(i,j,2)

fai(i,j)=fai(i,j)-0.05*pi;

end

if gBestC(1,j,3)>p(i,j,3)

sita(i,j)=sita(i,j)-0.05*pi;

end

if gBestC(1,j,3)<p(i,j,3)

sita(i,j)=sita(i,j)+0.05*pi;

end

end

end

%结束更新量子位

%开始变异量子位

Pm_rand=rand(Size,CodeL);%生成随机数，与变异概率比较，决定是否变异。

for i=1:1:Size

for j=1:1:CodeL

Pm=ones(1,Size)*pm0*(G-kg)/G;

if Pm(i)>Pm_rand(i,j)&&(i==gBestp)

fai(i,j)=0.5*pi-fai(i,j);

sita(i,j)=0.5*pi-sita(i,j);

end

end

end

%结束变异量子位

%生成新的染色体开始

p(:,1,1)=cos(fai(:,1)).*sin(sita(:,1));

p(:,1,2)=sin(fai(:,1)).*sin(sita(:,1));

p(:,1,3)=cos(sita(:,1));

p(:,2,1)=cos(fai(:,2)).*sin(sita(:,2));

p(:,2,2)=sin(fai(:,2)).*sin(sita(:,2));

p(:,2,3)=cos(sita(:,2));

p(:,3,1)=cos(fai(:,3)).*sin(sita(:,3));

p(:,3,2)=sin(fai(:,3)).*sin(sita(:,3));

p(:,3,3)=cos(sita(:,3));

%生成染色体结束

%解空间变换开始

x(:,1,:)=0.5*(MaxX(1)*(1+p(:,1,:))+MinX(1)*(1-p(:,1,:)));

x(:,2,:)=0.5*(MaxX(2)*(1+p(:,2,:))+MinX(2)*(1-p(:,2,:)));

x(:,3,:)=0.5*(MaxX(3)*(1+p(:,3,:))+MinX(3)*(1-p(:,3,:)));

%解空间变换结束

%计算函数值开始

for i=1:1:Size

x11=x(i,1,1);x12=x(i,2,1);x13=x(i,3,1);

x21=x(i,1,2);x22=x(i,2,2);x23=x(i,3,2);

x31=x(i,1,3);x32=x(i,2,3);x33=x(i,3,3);

B=[T(1)+x11 T(2)+x12 T(3)+x13 0 0 0];

Ft=compute_Ftt(B,Xob,Xg,rrR,rr,k);

F(i,1)=Ft;

B=[T(1)+x21 T(2)+x22 T(3)+x23 0 0 0];

Ft=compute_Ftt(B,Xob,Xg,rrR,rr,k);

F(i,2)=Ft;

B=[T(1)+x31 T(2)+x32 T(3)+x33 0 0 0];

Ft=compute_Ftt(B,Xob,Xg,rrR,rr,k);

F(i,3)=Ft;

end

%开始获得最小值及相应自变量

[Bestf,Indexf]=sort(F,2);

[BestF,IndexF]=sort(Bestf,1);

gBestfi=BestF(1,1);%最小函数值

gBestp=IndexF(1,1);%最好染色体号

gBests=Indexf(gBestp,1);%最好基因链号

gBestx=x(gBestp,:,gBests);%最优解

gBestC=p(gBestp,:,:);%最优染色体

end

function [Xggg,vertices,path]=compute_XggRRT(Xob,rr,rrR,Xg0,TTnext)

q_start = TTnext;%起点

q_goal =Xg0;%RRT最终的目标点。

vertices=q_start;%顶点vertices=起始点q_start;

edges = [];%边=空集

K=20;%设置采样数目可K;

delta_q=0.05;%设置间隔距离

pp=0.1;%初始化启发概率，目标点来启发过程中随机树的生长方向。pp越大目标点的启发最用越强，pp越小随机树生长的方向越随机。

q_rand=[];%随机生成的点

q_near=[];%距离q_rand最近的点

q_new=[];%新增叶子节点，q_new在q_nea和q_rand的连线上

%完成初始化，开始主循环

for k = 1:K

arrived=is_goal_arrived(vertices,q_goal,delta_q);%判断是否到达终点，调用function

if arrived %如果已到达目标点附近

vertices=[vertices;q_goal];

%记录下各顶点与目标点的坐标。vertices的构成为各顶点坐标构成的矩阵加上目标点的坐标，此矩阵的最后一行为目标点的坐标

edges = [edges;[size(vertices,1),size(vertices,1)-1]];%为画路径准备好条件。size(vertices,1)顶点构成的矩阵的行数。

break;

end

if rand <= pp %初始化启发概率。rand表示一个0到1的随机数

q_rand = q_goal;%q_rand随机生成的点 q_goal最终的目标点

else

q_rand = [(q_goal(1,1)-q_start(1,1))*rand(1,1)+q_start(1,1),(q_goal(1,2)-q_start(1,2))*rand(1,1)+q_start(1,2),(q_goal(1,3)-q_start(1,3))*rand(1,1)+q_start(1,3)];

%在起点和终点的坐标值之间随机取值

end

[q_new,q_near,q_near_ind] = get_qnew_qnear(delta_q,q_rand,vertices);%获得节点中最近点和新节点 %输出【新节点，最近顶点，最近顶点所在的行数】

add_qnew = is_add_in_veritces(q_new,q_near,Xob,rr,rrR);%添加新节点

if add_qnew

vertices=[vertices;q_new];%将新节点添加到顶点矩阵中

r_v = size(vertices,1);%记录顶点矩阵的行数

edges = [edges;[r_v,q_near_ind]];%添加信息【添加新节点后顶点矩阵的行数，距离此处新节点最近的顶点的行数】

else

continue;

end

end%大循环结束

path =find_path_node(edges);%%返回路径 ,path代表在顶点中的行数，返回的是行向量

Xggg=vertices(path(1),:);

function arrived=is_goal_arrived(vertices,q_goal,delta_q)%判断是否到达终点,所给变量有顶点、目标点、间隔距离

dist=sqrt((vertices(end,1)-q_goal(1,1))^2+(vertices(end,2)-q_goal(1,2))^2+(vertices(end,3)-q_goal(1,3))^2);%计算最后一个顶点与目标点的距离

if dist <= delta_q

arrived=1;

else

arrived=0;

end

end

function [q_new,q_near,q_near_ind] = get_qnew_qnear(delta_q,q_rand,vertices)%获得节点中最近点和新节点

for j=1:size(vertices,1)

%计算顶点与随机点的距离，vertices是存储顶点的矩阵，各顶点与随机点的距离保存在dist_rand数组中

dist_rand(j)=sqrt((vertices(j,1)-q_rand(1,1))^2+(vertices(j,2)-q_rand(1,2))^2+(vertices(j,3)-q_rand(1,3))^2);

end

[dist_min,q_near_ind]=min(dist_rand);%dist_min找出随机点与各顶点的最小距离，q_near_ind最小距离所在的行数

q_near=vertices(q_near_ind,:);%得出q_near的坐标，即与随机点最近的顶点的坐标。

vector_dir =q_rand-q_near;%随机点和最近点的坐标对应相减，vector是向量的意思.注意计算AB向量时，用B-A对应元素相减，不要弄反。

vector_dir = vector_dir./dist_min;%得出由最近顶点指向随机点的向量

if dist_min > delta_q %随机点到最近点的距离不确定

q_new =(q_near+delta_q*vector_dir );%此时的新节点取为q_near在向量方向上延伸delta_q的数

else

q_new=q_rand;%如果在delta_q范围内，q_rand赋值给新节点。

end

end

function add_qnew = is_add_in_veritces(q_new,q_near,Xob,rr,rrR)

%判断是否碰撞，输出:add_qnew=1不碰撞加入 0表示碰撞不加入

AA1=q_new;

AA2=q_near;

%开始求一元二次方程的解，根据解的个数和解的特征，判断是否碰撞。此处将连杆的半径加到障碍物的半径中，简化成球线关系，方便检测

a=AA2(1)-AA1(1);

b=AA2(2)-AA1(2);

c=AA2(3)-AA1(3);

m=AA1(1)-Xob(1,1);

n=AA1(2)-Xob(1,2);

p=AA1(3)-Xob(1,3);

bb=2*a*m+2*b*n+2*c*p;

aa=a^2+b^2+c^2;

cc=m^2+n^2+p^2-(rr(1)+rrR)^2;

delta=(bb)^2-4*(aa)*(cc);

if delta>0

f=2;

k121=real((-bb+sqrt(delta))/(2*aa));

k122=real((-bb-sqrt(delta))/(2*aa));

else

if delta==0

f=1;

k12=real(-bb/(2*aa));

else

f=0;

end

end

if (f==2)&&(((0<=k121)&&(k121<=1))||((0<=k122)&&(k122<=1))||((k121<0)&&(k122>1))||((k121>1)&&(k122<0)))

add_qnew=0;

else

if (f==1)&&((0<=k12)&&(k121<=1))

add_qnew=0;

else

m2=AA1(1)-Xob(2,1);

n2=AA1(2)-Xob(2,2);

p2=AA1(3)-Xob(2,3);

bb2=2*a*m2+2*b*n2+2*c*p2;

aa2=a^2+b^2+c^2;

cc2=m2^2+n2^2+p2^2-(rr(2)+rrR)^2;

delta2=(bb2)^2-4*(aa2)*(cc2);

if delta2>0

f2=2;

k121=real((-bb+sqrt(delta))/(2*aa));

k122=real((-bb-sqrt(delta))/(2*aa));

else

if delta2==0

f2=1;

k12=real(-bb/(2*aa));

else

f2=0;

end

end

if (f2==2)&&(((0<=k121)&&(k121<=1))||((0<=k122)&&(k122<=1))||((k121<0)&&(k122>1))||((k121>1)&&(k122<0)))

add_qnew=0;

else

if (f2==1)&&((0<=k12)&&(k121<=1))

add_qnew=0;

else

m3=AA1(1)-Xob(3,1);

n3=AA1(2)-Xob(3,2);

p3=AA1(3)-Xob(3,3);

bb3=2*a*m3+2*b*n3+2*c*p3;

aa3=a^2+b^2+c^2;

cc3=m3^2+n3^2+p3^2-(rr(3)+rrR)^2;

delta3=(bb3)^2-4*(aa3)*(cc3);

if delta3>0

f2=2;

k121=real((-bb+sqrt(delta))/(2*aa));

k122=real((-bb-sqrt(delta))/(2*aa));

else

if delta3==0

f2=1;

k12=real(-bb/(2*aa));

else

f2=0;

end

end

if (f2==2)&&(((0<=k121)&&(k121<=1))||((0<=k122)&&(k122<=1))||((k121<0)&&(k122>1))||((k121>1)&&(k122<0)))

add_qnew=0;

else

if (f2==1)&&((0<=k12)&&(k121<=1))

add_qnew=0;

else

m3=AA1(1)-Xob(4,1);

n3=AA1(2)-Xob(4,2);

p3=AA1(3)-Xob(4,3);

bb3=2*a*m3+2*b*n3+2*c*p3;

aa3=a^2+b^2+c^2;

cc3=m3^2+n3^2+p3^2-(rr(3)+rrR)^2;

delta3=(bb3)^2-4*(aa3)*(cc3);

if delta3>0

f2=2;

k121=real((-bb+sqrt(delta))/(2*aa));

k122=real((-bb-sqrt(delta))/(2*aa));

else

if delta3==0

f2=1;

k12=real(-bb/(2*aa));

else

f2=0;

end

end

if (f2==2)&&(((0<=k121)&&(k121<=1))||((0<=k122)&&(k122<=1))||((k121<0)&&(k122>1))||((k121>1)&&(k122<0)))

add_qnew=0;

else

if (f2==1)&&((0<=k12)&&(k121<=1))

add_qnew=0;

else

m3=AA1(1)-Xob(5,1);

n3=AA1(2)-Xob(5,2);

p3=AA1(3)-Xob(5,3);

bb3=2*a*m3+2*b*n3+2*c*p3;

aa3=a^2+b^2+c^2;

cc3=m3^2+n3^2+p3^2-(rr(3)+rrR)^2;

delta3=(bb3)^2-4*(aa3)*(cc3);

if delta3>0

f2=2;

k121=real((-bb+sqrt(delta))/(2*aa));

k122=real((-bb-sqrt(delta))/(2*aa));

else

if delta3==0

f2=1;

k12=real(-bb/(2*aa));

else

f2=0;

end

end

if (f2==2)&&(((0<=k121)&&(k121<=1))||((0<=k122)&&(k122<=1))||((k121<0)&&(k122>1))||((k121>1)&&(k122<0)))

add_qnew=0;

else

if (f2==1)&&((0<=k12)&&(k121<=1))

add_qnew=0;

else

add_qnew=1;

end

end

end

end

end

end

end

end

end

end

end

function path =find_path_node(edges)

%返回路径 ,path代表在顶点中的行数，返回的是行向量

e=edges(end,2);%返回edges的最后一行第二列的值

path = edges(end,:);%返回edges的最后一行坐标值

while true

ind= find(edges(:,1)==e);%找出距离新节点最近的顶点的所在位置（行数）。find函数的功能为查找非零元素的位置

tmp_e = edges(ind,:);%调出ind处的edges的矩阵信息，放在tmp_e中

e=tmp_e(2);%返回etmp_e中第二列的值

path=[path,e];%不断记录e的信息，完成while循环，形成路径。

if e==1

break;

end

end

end

end
